# Supplementary material for: Using computational chemistry to design pump–probe schemes for measuring nitrobenzene radical cation dynamics
Source: Royal Society of Chemistry journal article supplement (doi:10.1039/d1cp00360g), 2021-01-01
Supplement: d1cp00360g1.pdf [file d1cp00360g1.pdf]

# Electronic Supplementary Information: Using computational chemistry to design pump-probe schemes for measuring nitrobenzene radical cation dynamics

Hugo A. López Peña, Derrick Ampadu Boateng, Shane L. McPherson,  
and Katharine Moore Tibbetts

*Department of Chemistry, Virginia Commonwealth University,  
Richmond, VA 23284*

## Supplemental Figures

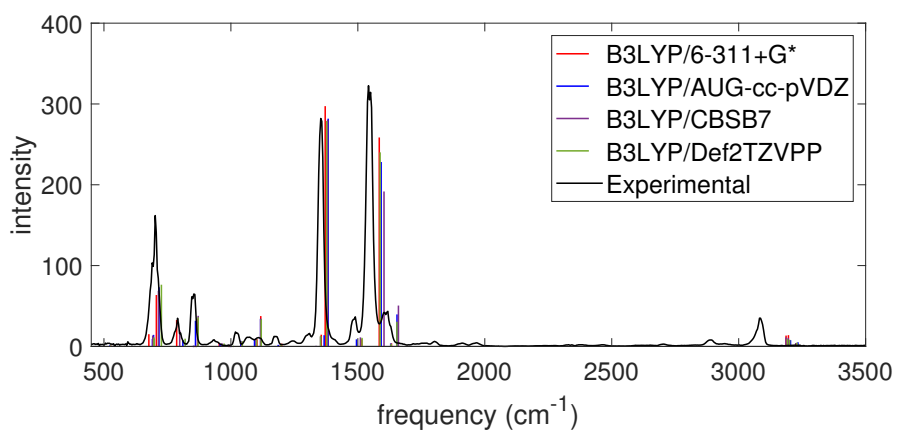

Figure S1: Experimental (black) and computed infrared spectra using the B3LYP functional with different basis sets for NB.

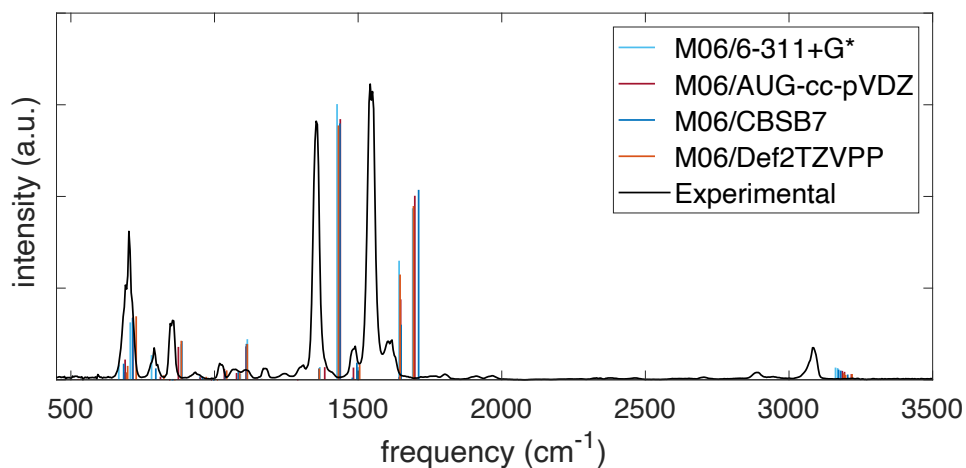

Figure S2: Experimental (black) and computed infrared spectra using the M06 functional with different basis sets for NB.

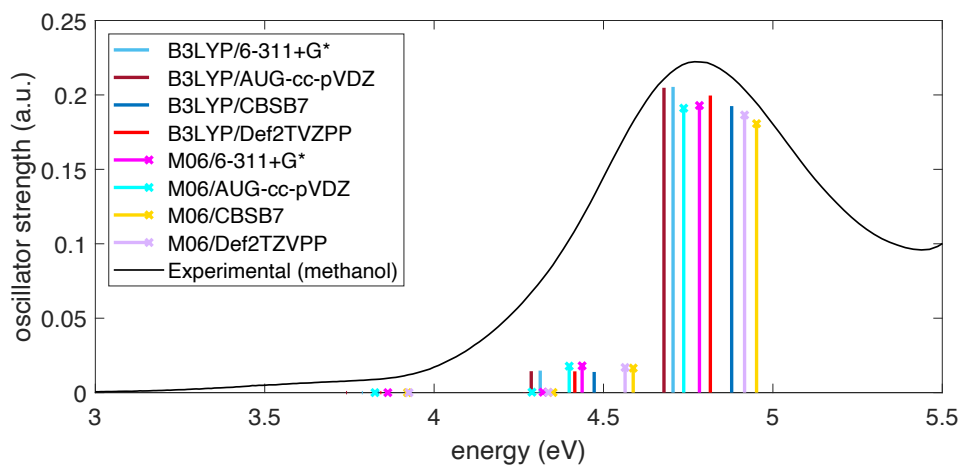

Figure S3: Experimental (black) and computed UV-Vis spectra using the B3LYP and M06 functionals with different basis sets for NB.

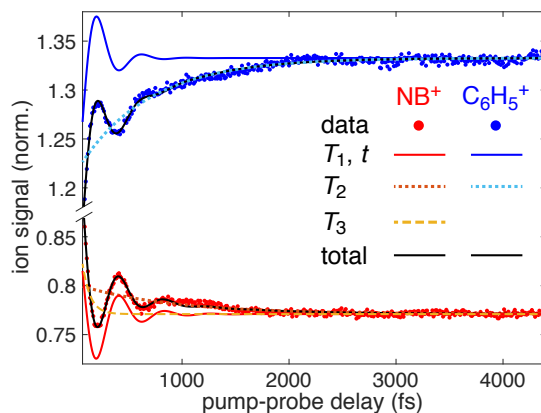

Figure S4: Ion signals (dots) of NB<sup>+</sup> (red) and C<sub>6</sub>H<sub>5</sub><sup>+</sup> (blue) obtained with 650 nm probe pulses at  $10^{12} \text{ W cm}^{-2}$ , with fits to eq 1 in the main work (black lines) and components  $T_1$ ,  $T_2$ , and  $T_3$  (solid, dotted, and dashed lines). C<sub>6</sub>H<sub>5</sub><sup>+</sup> did not require a  $T_3$  component.

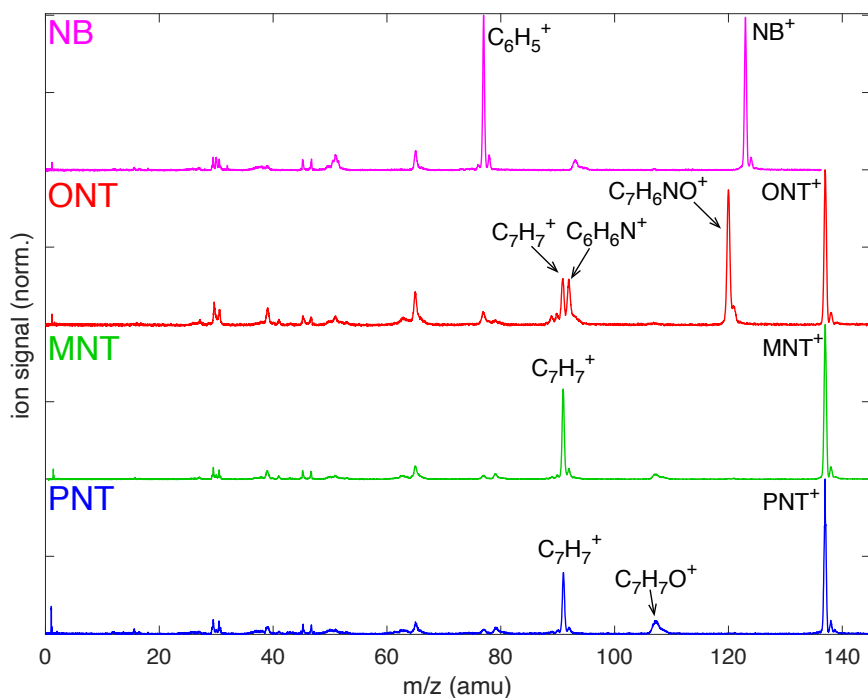

Figure S5: Mass spectra of NB (magenta), ONT (red), MNT (green), and PNT (blue) taken with 1300 nm pump only.

## Tabulated theoretical results

|   | Neutral   |           |           | Cation    |           |           |
|---|-----------|-----------|-----------|-----------|-----------|-----------|
| C | 0.241731  | 0.000000  | 0.000037  | 0.239436  | -0.005728 | 0.015543  |
| C | -0.429303 | -1.215050 | 0.000072  | -0.423645 | -1.231631 | 0.232515  |
| C | -1.817324 | -1.207038 | 0.000044  | -1.792522 | -1.216632 | 0.223226  |
| C | -0.429303 | 1.215050  | -0.000037 | -0.427462 | 1.224794  | -0.226463 |
| C | -1.817323 | 1.207038  | -0.000062 | -1.796491 | 1.218089  | -0.229544 |
| C | -2.509993 | 0.000000  | -0.000022 | -2.485236 | 0.004167  | -0.009561 |
| N | 1.718763  | 0.000000  | 0.000096  | 1.691325  | 0.001143  | 0.022143  |
| O | 2.286043  | 1.081198  | 0.000085  | 2.271968  | -0.390600 | 1.004127  |
| O | 2.286045  | -1.081198 | -0.000190 | 2.192149  | 0.402257  | -1.015975 |
| H | 0.133992  | -2.135132 | 0.000127  | 0.145562  | -2.133022 | 0.411568  |
| H | -2.357594 | -2.143644 | 0.000073  | -2.354042 | -2.124272 | 0.394744  |
| H | -3.591754 | 0.000000  | -0.000046 | -3.567685 | -0.000543 | -0.020030 |
| H | -2.357593 | 2.143644  | -0.000112 | -2.351615 | 2.129048  | -0.402238 |
| H | 0.133993  | 2.135132  | -0.000069 | 0.148641  | 2.122930  | -0.400057 |

Table S1: Geometric coordinates for neutral and cationic NB optimized at the B3LYP/Def2TZVPP level.

| Atom        | RMSD    | MRMSD   |
|-------------|---------|---------|
| C1          | 0.01385 | 0.01385 |
| C2          | 0.11181 | 0.11181 |
| C3          | 0.10986 | 0.10986 |
| C4          | 0.10562 | 0.10562 |
| C5          | 0.10675 | 0.10675 |
| C6          | 0.02507 | 0.02507 |
| N7          | 0.03129 | 0.03129 |
| O8          | 1.83292 | 1.83292 |
| O9          | 1.86775 | 1.86775 |
| H10         | 0.19432 | 0.19432 |
| H11         | 0.18418 | 0.18418 |
| H12         | 0.02649 | 0.02649 |
| H13         | 0.18032 | 0.18032 |
| H14         | 0.18726 | 0.18726 |
| All H atoms | 0.16731 | 0.37412 |
| All C atoms | 0.08939 | 0.21896 |
| All N atoms | 0.03129 | 0.03129 |
| All O atoms | 1.85042 | 2.61689 |
| All atoms   | 0.70897 | 2.65272 |

Table S2: Root-mean-square distances (RMSD) and modified root-mean-square distances (MRMSD, see definition in the main work) between neutral and cationic NB geometries optimized at the B3LYP/Def2TZVPP level. Values are given in Å.

| 6-311+G*  |           | CBSB7     |           | AUGCCPVDZ |           | DEF2TZVPP |           |
|-----------|-----------|-----------|-----------|-----------|-----------|-----------|-----------|
| Frequency | Intensity | Frequency | Intensity | Frequency | Intensity | Frequency | Intensity |
| 49.44     | 0.00      | 52.63     | 0.00      | 55.51     | 0.00      | 51.42     | 0.00      |
| 168.56    | 0.86      | 169.83    | 0.83      | 170.36    | 0.93      | 169.46    | 0.93      |
| 255.75    | 0.98      | 257.25    | 1.11      | 253.88    | 0.82      | 256.82    | 0.88      |
| 394.76    | 0.85      | 395.76    | 1.07      | 394.44    | 1.12      | 395.89    | 1.04      |
| 416.89    | 0.00      | 417.99    | 0.00      | 418.36    | 0.00      | 420.13    | 0.00      |
| 439.68    | 1.03      | 444.99    | 0.51      | 447.72    | 0.69      | 450.06    | 0.54      |
| 526.65    | 1.15      | 527.30    | 1.20      | 523.20    | 1.32      | 526.38    | 1.26      |
| 627.63    | 0.05      | 627.16    | 0.03      | 621.10    | 0.05      | 628.61    | 0.04      |
| 676.89    | 15.08     | 692.17    | 13.43     | 691.00    | 9.15      | 697.20    | 11.04     |
| 696.86    | 8.33      | 697.23    | 8.92      | 695.43    | 14.28     | 698.22    | 8.82      |
| 706.48    | 63.58     | 714.63    | 68.73     | 716.81    | 73.18     | 726.31    | 76.34     |
| 786.44    | 32.61     | 798.37    | 19.71     | 810.90    | 7.79      | 819.72    | 9.54      |
| 853.33    | 0.00      | 859.61    | 0.00      | 849.94    | 0.00      | 862.79    | 0.00      |
| 868.79    | 34.18     | 871.06    | 37.85     | 860.57    | 31.69     | 871.10    | 35.96     |
| 954.12    | 4.39      | 964.63    | 4.01      | 957.47    | 3.06      | 973.11    | 3.60      |
| 990.30    | 0.00      | 999.15    | 0.00      | 995.34    | 0.00      | 1006.92   | 0.00      |
| 1010.57   | 0.16      | 1018.75   | 0.21      | 1012.90   | 0.23      | 1024.48   | 0.25      |
| 1020.07   | 0.31      | 1018.86   | 0.23      | 1016.79   | 0.04      | 1024.93   | 0.14      |
| 1043.67   | 6.03      | 1042.37   | 5.56      | 1038.91   | 6.91      | 1045.18   | 6.45      |
| 1102.75   | 8.85      | 1098.36   | 10.03     | 1093.02   | 8.62      | 1101.35   | 8.38      |
| 1117.63   | 37.52     | 1117.06   | 33.63     | 1117.07   | 34.21     | 1119.54   | 33.52     |
| 1188.41   | 0.70      | 1184.07   | 0.40      | 1174.37   | 0.53      | 1186.51   | 0.60      |
| 1199.93   | 3.45      | 1194.74   | 1.69      | 1186.23   | 1.95      | 1197.64   | 2.81      |
| 1344.03   | 0.06      | 1335.44   | 0.78      | 1319.05   | 0.04      | 1342.77   | 0.28      |
| 1355.90   | 14.48     | 1353.16   | 11.92     | 1367.20   | 13.82     | 1353.23   | 12.89     |
| 1371.42   | 297.31    | 1381.04   | 280.44    | 1383.20   | 281.80    | 1377.21   | 278.89    |
| 1491.98   | 0.25      | 1488.84   | 0.55      | 1473.43   | 0.07      | 1493.28   | 0.07      |
| 1515.56   | 8.90      | 1510.04   | 11.18     | 1494.63   | 8.75      | 1516.48   | 10.56     |
| 1584.35   | 258.52    | 1603.07   | 191.73    | 1591.84   | 228.16    | 1587.68   | 240.15    |
| 1632.54   | 3.80      | 1631.18   | 3.19      | 1629.41   | 3.61      | 1631.14   | 3.10      |
| 1654.50   | 30.41     | 1659.87   | 50.54     | 1654.22   | 39.58     | 1653.79   | 30.48     |
| 3173.63   | 0.92      | 3173.35   | 0.75      | 3182.97   | 0.63      | 3178.95   | 0.68      |
| 3186.59   | 13.39     | 3186.11   | 11.16     | 3195.16   | 8.85      | 3191.85   | 9.02      |
| 3195.87   | 13.90     | 3195.11   | 10.49     | 3204.07   | 7.75      | 3200.42   | 8.14      |
| 3226.52   | 0.02      | 3224.43   | 0.42      | 3233.07   | 0.57      | 3229.56   | 0.47      |
| 3226.75   | 3.72      | 3224.71   | 4.17      | 3233.44   | 5.11      | 3229.69   | 4.76      |

Table S3: Calculated harmonic frequencies ( $\text{cm}^{-1}$ ) and intensities for NB using the B3LYP functional with different basis sets.

| 6-311+G*  |           | CBSB7     |           | AUGCCPVDZ |           | DEF2TZVPP |           |
|-----------|-----------|-----------|-----------|-----------|-----------|-----------|-----------|
| Frequency | Intensity | Frequency | Intensity | Frequency | Intensity | Frequency | Intensity |
| 50.72     | 0.00      | 53.21     | 0.00      | 58.70     | 0.00      | 55.11     | 0.00      |
| 167.49    | 0.91      | 168.40    | 0.87      | 168.98    | 0.93      | 169.02    | 0.99      |
| 257.90    | 0.88      | 258.41    | 1.02      | 255.89    | 0.77      | 256.14    | 0.83      |
| 397.78    | 0.96      | 397.95    | 1.14      | 396.18    | 1.24      | 396.57    | 1.19      |
| 411.71    | 0.00      | 412.22    | 0.00      | 412.35    | 0.00      | 417.06    | 0.00      |
| 430.11    | 0.95      | 437.21    | 0.52      | 441.38    | 0.70      | 446.39    | 0.42      |
| 529.65    | 0.79      | 530.24    | 0.86      | 525.60    | 0.97      | 528.68    | 0.86      |
| 617.95    | 0.07      | 617.26    | 0.03      | 609.87    | 0.05      | 619.14    | 0.05      |
| 666.86    | 16.50     | 683.78    | 17.57     | 687.02    | 8.37      | 694.28    | 8.04      |
| 693.74    | 7.39      | 693.90    | 7.65      | 688.85    | 22.07     | 697.63    | 15.20     |
| 706.85    | 62.62     | 714.98    | 67.52     | 715.83    | 67.97     | 727.42    | 69.28     |
| 780.89    | 26.93     | 795.68    | 12.47     | 811.88    | 3.42      | 823.58    | 4.99      |
| 849.43    | 0.00      | 853.54    | 0.00      | 842.65    | 0.00      | 860.39    | 0.00      |
| 884.06    | 38.83     | 886.20    | 42.27     | 874.29    | 35.89     | 884.54    | 42.60     |
| 948.79    | 4.01      | 957.95    | 3.71      | 950.40    | 2.68      | 971.21    | 3.28      |
| 987.72    | 0.00      | 994.72    | 0.00      | 987.56    | 0.00      | 1008.69   | 0.00      |
| 1008.33   | 0.09      | 1011.02   | 0.14      | 1002.52   | 0.15      | 1018.89   | 0.31      |
| 1012.53   | 0.19      | 1012.61   | 0.13      | 1011.10   | 0.02      | 1028.45   | 0.08      |
| 1040.45   | 8.63      | 1038.00   | 9.24      | 1034.35   | 11.89     | 1042.33   | 10.27     |
| 1090.14   | 6.61      | 1083.13   | 8.36      | 1076.86   | 7.44      | 1087.94   | 7.26      |
| 1114.28   | 44.29     | 1111.12   | 39.20     | 1110.01   | 36.45     | 1114.24   | 38.98     |
| 1163.48   | 1.18      | 1158.78   | 0.83      | 1147.82   | 1.03      | 1164.55   | 1.05      |
| 1180.24   | 0.20      | 1175.24   | 0.03      | 1167.64   | 0.08      | 1180.12   | 0.08      |
| 1312.09   | 0.03      | 1304.66   | 0.32      | 1288.28   | 0.00      | 1314.35   | 0.08      |
| 1366.71   | 13.91     | 1363.38   | 12.27     | 1383.75   | 13.80     | 1364.89   | 12.30     |
| 1426.68   | 300.74    | 1436.38   | 279.62    | 1437.92   | 284.35    | 1431.54   | 277.47    |
| 1482.28   | 0.99      | 1479.88   | 2.37      | 1468.81   | 0.75      | 1487.30   | 1.04      |
| 1499.92   | 13.83     | 1495.72   | 18.75     | 1483.78   | 13.37     | 1505.29   | 16.33     |
| 1642.64   | 129.90    | 1643.76   | 2.62      | 1643.96   | 3.21      | 1645.70   | 2.27      |
| 1644.91   | 3.13      | 1649.48   | 60.11     | 1648.03   | 87.73     | 1646.02   | 114.83    |
| 1690.06   | 187.10    | 1710.63   | 207.20    | 1697.32   | 200.75    | 1692.71   | 189.55    |
| 3147.31   | 1.81      | 3158.56   | 1.57      | 3173.23   | 1.02      | 3175.52   | 1.35      |
| 3161.88   | 13.33     | 3172.51   | 11.11     | 3185.44   | 9.72      | 3190.55   | 7.22      |
| 3169.30   | 12.73     | 3179.82   | 10.03     | 3193.23   | 8.69      | 3196.86   | 5.24      |
| 3194.88   | 0.01      | 3204.25   | 0.32      | 3217.20   | 6.28      | 3219.36   | 6.34      |
| 3194.91   | 5.34      | 3204.34   | 5.76      | 3217.43   | 0.30      | 3219.41   | 0.65      |

Table S4: Calculated harmonic frequencies ( $\text{cm}^{-1}$ ) and intensities for NB using the M06 functional with different basis sets.

| 6-311+G*  |           | CBSB7     |           | AUGCCPVDZ |           | DEF2TZVPP |           |
|-----------|-----------|-----------|-----------|-----------|-----------|-----------|-----------|
| Frequency | Intensity | Frequency | Intensity | Frequency | Intensity | Frequency | Intensity |
| 37.48     | 0.05      | 67.63     | 0.06      | 31.82     | 0.05      | 53.87     | 0.03      |
| 63.13     | 0.32      | 96.41     | 4.46      | 51.54     | 0.26      | 74.35     | 5.78      |
| 159       | 0.61      | 189.65    | 7.2       | 157.41    | 0.75      | 169.1     | 6.16      |
| 247.06    | 6.61      | 273.52    | 16.91     | 240.18    | 6.54      | 248.4     | 11.43     |
| 363.34    | 1.25      | 363.84    | 3.04      | 361.37    | 0.39      | 362.93    | 1.97      |
| 365.06    | 1.19      | 368.22    | 0.33      | 362.46    | 1.76      | 366.48    | 0.67      |
| 394.98    | 0.65      | 408.62    | 6.52      | 395.2     | 0.76      | 401.63    | 4.02      |
| 496.05    | 0.77      | 513.14    | 6.01      | 496.56    | 0.59      | 504.76    | 2.22      |
| 622.38    | 35.02     | 622.78    | 35.06     | 620.3     | 32.14     | 628.64    | 33.46     |
| 669.75    | 0.02      | 666.41    | 0.12      | 660.45    | 0         | 668.15    | 0.34      |
| 724.81    | 17.12     | 719.52    | 26.2      | 719.29    | 12.96     | 729.37    | 15.28     |
| 792.2     | 53.13     | 786.07    | 47.06     | 786.53    | 44.11     | 793.56    | 42.42     |
| 802.73    | 39.28     | 800.39    | 50.69     | 796.98    | 3.82      | 808.64    | 30.08     |
| 804.94    | 3.14      | 815.32    | 2.85      | 800.42    | 33.78     | 816.63    | 11.3      |
| 965.23    | 5.2       | 967.31    | 5.81      | 959.35    | 4.93      | 976.14    | 7.03      |
| 980.51    | 58.9      | 982.32    | 62.17     | 980.75    | 55.58     | 983.67    | 58.1      |
| 1003.5    | 0.01      | 1001.54   | 0.05      | 995.37    | 0.03      | 1007.61   | 0.02      |
| 1008.27   | 0.16      | 1012.9    | 0.1       | 999.61    | 0.46      | 1023.49   | 0.06      |
| 1020.1    | 0.73      | 1017.8    | 1.04      | 1012.91   | 0.65      | 1034.91   | 0.64      |
| 1068.92   | 3.23      | 1079.5    | 5.09      | 1070.26   | 3.92      | 1077.45   | 4.2       |
| 1142.2    | 7.62      | 1136.09   | 0.75      | 1142.44   | 5.1       | 1142.34   | 2.03      |
| 1162.93   | 3.9       | 1156.73   | 5.16      | 1152.22   | 2.63      | 1162.3    | 3.54      |
| 1219.69   | 10.09     | 1211.72   | 7.24      | 1206.51   | 9.29      | 1216.86   | 9.67      |
| 1297.21   | 14.78     | 1303.47   | 10.68     | 1290.38   | 8.62      | 1301.35   | 11.61     |
| 1385.46   | 20.14     | 1335.19   | 186.52    | 1368.12   | 7.64      | 1370.44   | 107.73    |
| 1392.31   | 19.14     | 1388.05   | 21.68     | 1397.29   | 19.97     | 1392.74   | 22.04     |
| 1404      | 15.47     | 1400.97   | 10.48     | 1417.67   | 13.33     | 1404.14   | 7.65      |
| 1444.64   | 79.87     | 1462.56   | 116.99    | 1442.53   | 122.95    | 1468.36   | 128.06    |
| 1466      | 114.59    | 1485.11   | 167.63    | 1460.07   | 79.33     | 1471.78   | 111.72    |
| 1521.39   | 37.17     | 1514.05   | 31.52     | 1506.64   | 44.49     | 1522.2    | 34.53     |
| 1645.31   | 106.9     | 1626.34   | 99.84     | 1642.33   | 100.3     | 1638.84   | 98.4      |
| 3201.78   | 0.01      | 3195.9    | 0.39      | 3201.93   | 0.56      | 3197.64   | 0.52      |
| 3211.06   | 1.1       | 3206.67   | 3.25      | 3212.13   | 1.01      | 3209.04   | 2.59      |
| 3213.08   | 6.75      | 3209.74   | 8.74      | 3213.98   | 12.13     | 3211.01   | 9.57      |
| 3221.08   | 25.62     | 3216.81   | 29.74     | 3222.62   | 36.94     | 3218.85   | 32.12     |
| 3223.3    | 0.09      | 3219.75   | 6.92      | 3224.78   | 0.61      | 3221.33   | 3.79      |

Table S5: Calculated harmonic frequencies ( $\text{cm}^{-1}$ ) and intensities for NB cation using the B3LYP functional with different basis sets.

| 6-311+G*  |           | CBSB7     |           | AUGCCPVDZ |           | DEF2TZVPP |           |
|-----------|-----------|-----------|-----------|-----------|-----------|-----------|-----------|
| Frequency | Intensity | Frequency | Intensity | Frequency | Intensity | Frequency | Intensity |
| 71.29     | 0.90      | 58.64     | 0.48      | 62.64     | 0.89      | 47.60     | 0.32      |
| 82.05     | 0.61      | 75.02     | 1.13      | 73.87     | 0.39      | 69.90     | 0.85      |
| 173.26    | 1.36      | 164.96    | 0.62      | 168.93    | 1.05      | 158.38    | 0.46      |
| 259.10    | 5.37      | 259.69    | 5.96      | 256.29    | 5.48      | 252.15    | 6.22      |
| 355.27    | 2.17      | 355.53    | 2.75      | 350.75    | 1.63      | 359.30    | 2.55      |
| 366.40    | 4.47      | 368.41    | 3.51      | 365.10    | 5.00      | 366.69    | 3.57      |
| 377.68    | 0.48      | 374.39    | 0.56      | 375.27    | 0.44      | 379.46    | 0.55      |
| 474.65    | 1.11      | 481.88    | 0.83      | 465.38    | 1.14      | 486.73    | 0.70      |
| 612.54    | 31.67     | 609.46    | 29.52     | 608.73    | 28.25     | 620.05    | 27.10     |
| 672.81    | 4.00      | 673.05    | 2.42      | 664.71    | 4.26      | 671.99    | 3.63      |
| 730.15    | 25.19     | 725.70    | 30.72     | 721.98    | 20.02     | 734.51    | 20.80     |
| 795.27    | 1.03      | 795.73    | 25.63     | 784.65    | 0.69      | 805.03    | 2.84      |
| 799.95    | 28.89     | 796.71    | 3.15      | 799.38    | 23.96     | 813.13    | 23.53     |
| 820.11    | 13.17     | 813.99    | 19.49     | 812.24    | 7.98      | 816.14    | 13.01     |
| 951.82    | 6.61      | 951.75    | 6.97      | 946.76    | 6.18      | 966.49    | 7.25      |
| 980.05    | 63.07     | 980.19    | 60.90     | 977.16    | 54.50     | 983.83    | 62.11     |
| 995.93    | 0.05      | 992.09    | 0.68      | 985.64    | 2.61      | 1001.62   | 0.45      |
| 1001.53   | 0.09      | 993.51    | 0.59      | 989.62    | 1.48      | 1019.64   | 0.05      |
| 1005.20   | 0.57      | 1002.67   | 0.27      | 996.17    | 0.53      | 1024.51   | 0.41      |
| 1052.56   | 1.88      | 1054.71   | 3.18      | 1046.55   | 2.21      | 1061.38   | 2.88      |
| 1142.41   | 7.74      | 1139.32   | 5.14      | 1131.58   | 3.40      | 1144.20   | 6.58      |
| 1145.76   | 3.33      | 1140.70   | 3.31      | 1139.23   | 4.55      | 1147.20   | 2.99      |
| 1202.19   | 9.28      | 1197.89   | 9.60      | 1190.57   | 10.18     | 1203.16   | 10.08     |
| 1286.87   | 11.71     | 1284.72   | 8.88      | 1272.97   | 8.09      | 1291.15   | 9.63      |
| 1363.61   | 6.43      | 1358.77   | 5.71      | 1343.82   | 4.93      | 1370.14   | 6.00      |
| 1417.55   | 27.34     | 1413.44   | 26.18     | 1420.98   | 21.75     | 1413.69   | 25.46     |
| 1439.35   | 127.28    | 1434.20   | 130.26    | 1421.74   | 147.79    | 1441.33   | 66.65     |
| 1447.31   | 21.88     | 1444.46   | 13.81     | 1455.01   | 0.04      | 1449.45   | 76.62     |
| 1515.78   | 53.48     | 1510.73   | 53.67     | 1508.73   | 58.52     | 1519.75   | 50.43     |
| 1582.22   | 160.42    | 1568.31   | 120.02    | 1602.43   | 148.24    | 1564.21   | 142.38    |
| 1664.33   | 68.61     | 1660.02   | 80.47     | 1662.97   | 60.80     | 1664.35   | 74.73     |
| 3158.00   | 0.65      | 3165.05   | 1.46      | 3177.65   | 1.57      | 3178.63   | 2.64      |
| 3175.78   | 4.88      | 3184.61   | 5.54      | 3195.73   | 4.74      | 3199.96   | 8.41      |
| 3176.08   | 7.81      | 3184.66   | 11.28     | 3196.09   | 9.74      | 3200.03   | 9.57      |
| 3186.10   | 25.65     | 3194.70   | 33.70     | 3206.28   | 30.19     | 3210.04   | 40.28     |
| 3187.84   | 0.23      | 3196.32   | 0.57      | 3207.65   | 0.44      | 3211.69   | 1.33      |

Table S6: Calculated harmonic frequencies ( $\text{cm}^{-1}$ ) and intensities for NB cation using the M06 functional with different basis sets.



|       | 6-311+G* |        | CBSB7  |        | AUGCCPVDZ |        | DEF2TZVPP |        |
|-------|----------|--------|--------|--------|-----------|--------|-----------|--------|
| State | EE       | f      | EE     | f      | EE        | f      | EE        | f      |
| S1    | 3.7867   | 0      | 3.835  | 0      | 3.74      | 0      | 3.8413    | 0      |
| S2    | 4.3037   | 0.0003 | 4.3277 | 0.0001 | 4.2676    | 0.0003 | 4.3423    | 0.0002 |
| S3    | 4.3132   | 0.0148 | 4.4725 | 0.0139 | 4.2867    | 0.0144 | 4.4153    | 0.0143 |
| S4    | 4.7053   | 0.2054 | 4.8783 | 0.1925 | 4.6785    | 0.2048 | 4.8154    | 0.1996 |
| S5    | 5.9144   | 0.001  | 6.0127 | 0.0001 | 5.8483    | 0.0026 | 5.9682    | 0      |
| S6    | 6.0367   | 0.0621 | 6.1241 | 0.055  | 5.9704    | 0.0594 | 6.0931    | 0.0604 |
| S7    | 6.3457   | 0      | 6.2888 | 0      | 6.237     | 0.0001 | 6.305     | 0      |
| S8    | 6.4389   | 0.177  | 6.5457 | 0.1777 | 6.3824    | 0.1899 | 6.4839    | 0.1916 |
| S9    | 6.5271   | 0      | 6.6172 | 0      | 6.4134    | 0      | 6.5238    | 0      |
| S10   | 6.7257   | 0      | 6.6559 | 0      | 6.6026    | 0      | 6.6699    | 0      |

Table S7: Calculated excitation energies (eV) and oscillator strengths (a.u.) for NB using the B3LYP functional with different basis sets under the TDDFT formalism.

|       | 6-311+G* |        | CBSB7  |        | AUGCCPVDZ |        | DEF2TZVPP |        |
|-------|----------|--------|--------|--------|-----------|--------|-----------|--------|
| State | EE       | f      | EE     | f      | EE        | f      | EE        | f      |
| S1    | 3.8634   | 0.0000 | 3.9214 | 0.0000 | 3.8254    | 0.0000 | 3.9259    | 0.0000 |
| S2    | 4.3217   | 0.0003 | 4.3510 | 0.0001 | 4.2889    | 0.0003 | 4.3373    | 0.0002 |
| S3    | 4.4369   | 0.0180 | 4.5877 | 0.0165 | 4.3988    | 0.0178 | 4.5637    | 0.0169 |
| S4    | 4.7832   | 0.1929 | 4.9518 | 0.1807 | 4.7368    | 0.1911 | 4.9164    | 0.1865 |
| S5    | 5.9566   | 0.0092 | 6.0762 | 0.0172 | 5.9064    | 0.0098 | 6.0378    | 0.0133 |
| S6    | 6.1733   | 0.0000 | 6.4048 | 0.0499 | 5.9839    | 0.0000 | 6.3253    | 0.0642 |
| S7    | 6.2717   | 0.0613 | 6.4430 | 0.1995 | 6.1272    | 0.0065 | 6.3828    | 0.2188 |
| S8    | 6.3098   | 0.1967 | 6.5820 | 0.0000 | 6.1928    | 0.0615 | 6.5503    | 0.0000 |
| S9    | 6.3259   | 0.0055 | 6.6217 | 0.0000 | 6.2307    | 0.2100 | 6.5568    | 0.0000 |
| S10   | 6.5348   | 0.0000 | 6.8241 | 0.0000 | 6.3944    | 0.0000 | 6.7779    | 0.0000 |

Table S8: Calculated excitation energies (eV) and oscillator strengths (a.u.) for NB using the M06 functional with different basis sets under the TDDFT formalism.

|       | 6-311+G* |        | CBSB7  |        | AUGCCPVDZ |        | DEF2TZVPP |        |
|-------|----------|--------|--------|--------|-----------|--------|-----------|--------|
| State | EE       | f      | EE     | f      | EE        | f      | EE        | f      |
| D1    | 0.6386   | 0      | 0.6424 | 0      | 0.6448    | 0      | 0.6657    | 0      |
| D2    | 1.1537   | 0.001  | 1.149  | 0.003  | 1.1669    | 0.001  | 1.1853    | 0.0025 |
| D3    | 1.4923   | 0      | 1.4226 | 0.0034 | 1.5243    | 0      | 1.5346    | 0.0012 |
| D4    | 1.7183   | 0.0799 | 1.6651 | 0.0694 | 1.7276    | 0.0779 | 1.7529    | 0.0777 |
| D5    | 3.0281   | 0.0007 | 3.0017 | 0.0006 | 2.9696    | 0.0007 | 2.9779    | 0.0007 |
| D6    | 3.0411   | 0      | 3.0679 | 0      | 3.059     | 0      | 3.153     | 0      |
| D7    | 3.4059   | 0.0022 | 3.3944 | 0.0019 | 3.3869    | 0.002  | 3.4435    | 0.0017 |
| D8    | 3.6041   | 0.0003 | 3.5643 | 0.0006 | 3.5396    | 0.0003 | 3.5556    | 0.0004 |
| D9    | 3.7937   | 0.0074 | 3.6724 | 0.0088 | 3.7663    | 0.0039 | 3.7625    | 0.0077 |
| D10   | 3.7989   | 0.0171 | 3.9523 | 0.0141 | 3.7838    | 0.0201 | 3.9489    | 0.0167 |

Table S9: Calculated excitation energies (eV) and oscillator strengths (a.u.) for NB cation using the B3LYP functional with different basis sets under the TDDFT formalism.

|       | 6-311+G* |        | CBSB7  |        | AUGCCPVDZ |        | DEF2TZVPP |        |
|-------|----------|--------|--------|--------|-----------|--------|-----------|--------|
| State | EE       | f      | EE     | f      | EE        | f      | EE        | f      |
| D1    | 0.6416   | 0.0000 | 0.6354 | 0.0000 | 0.6319    | 0.0000 | 0.6669    | 0.0000 |
| D2    | 1.2956   | 0.0008 | 1.2138 | 0.0007 | 1.3078    | 0.0007 | 1.2172    | 0.0007 |
| D3    | 1.6794   | 0.0001 | 1.5694 | 0.0001 | 1.7022    | 0.0001 | 1.6340    | 0.0001 |
| D4    | 1.7905   | 0.0706 | 1.7225 | 0.0669 | 1.7842    | 0.0650 | 1.7620    | 0.0681 |
| D5    | 3.0271   | 0.0007 | 2.9810 | 0.0007 | 2.9583    | 0.0007 | 2.9656    | 0.0007 |
| D6    | 3.3725   | 0.0040 | 3.3697 | 0.0047 | 3.3405    | 0.0044 | 3.3778    | 0.0043 |
| D7    | 3.4568   | 0.0001 | 3.4360 | 0.0002 | 3.4066    | 0.0001 | 3.4573    | 0.0002 |
| D8    | 3.6111   | 0.0002 | 3.5802 | 0.0001 | 3.5515    | 0.0002 | 3.6056    | 0.0001 |
| D9    | 3.9137   | 0.0283 | 3.9402 | 0.0290 | 3.8823    | 0.0299 | 3.9888    | 0.0303 |
| D10   | 4.0236   | 0.0012 | 4.0303 | 0.0013 | 3.9935    | 0.0014 | 4.0484    | 0.0011 |

Table S10: Calculated excitation energies (eV) and oscillator strengths (a.u.) for NB cation using the M06 functional with different basis sets under the TDDFT formalism.

| transition                      | neutral geometry |            | cation geometry |            |
|---------------------------------|------------------|------------|-----------------|------------|
|                                 | EE (eV)          | $f$ (a.u.) | EE (eV)         | $f$ (a.u.) |
| D <sub>0</sub> → D <sub>1</sub> | 0.0929           | 0.000004   | 0.1385          | 0.000007   |
| D <sub>0</sub> → D <sub>2</sub> | 1.1993           | 0.000000   | 1.3287          | 0.000000   |
| D <sub>0</sub> → D <sub>3</sub> | 1.3146           | 0.000634   | 1.5099          | 0.000877   |
| D <sub>0</sub> → D <sub>4</sub> | 1.3755           | 0.000001   | 1.6319          | 0.000003   |
| D <sub>0</sub> → D <sub>5</sub> | 3.1485           | 0.040960   | 3.1052          | 0.040215   |

Table S11: Excitation energies (EE) and oscillator strengths ( $f$ ) for NB cation at the optimized neutral and cation geometries at the EOM-EE-CCSD/6-311+G\* level of theory.

## Tabulated curve fitting results

Tables S12 through S15 give the coefficients extracted from fitting transient ion signals obtained at conditions indicated to eq 1 in the main text.

| eq (1)                     | NB <sup>+</sup> | C <sub>6</sub> H <sub>5</sub> <sup>+</sup> | C <sub>4</sub> H <sub>3</sub> <sup>+</sup> |
|----------------------------|-----------------|--------------------------------------------|--------------------------------------------|
| <i>a</i>                   | 0.11 ± 0.02     | 0.13 ± 0.02                                | –                                          |
| <i>T</i> <sub>1</sub> (fs) | 242 ± 15        | 176 ± 15                                   | –                                          |
| <i>t</i> (fs)              | 426 ± 10        | 421 ± 14                                   | –                                          |
| <i>φ</i> (rad)             | −0.04 ± 0.08    | 3.07 ± 0.09                                | –                                          |
| <i>b</i>                   | 0.031 ± 0.003   | −0.116 ± 0.004                             | −0.024 ± 0.003                             |
| <i>T</i> <sub>2</sub> (fs) | 870 ± 100       | 654 ± 28                                   | 230 ± 60                                   |
| <i>c</i>                   | 0.14 ± 0.06     | –                                          | 0.016 ± 0.003                              |
| <i>T</i> <sub>3</sub> (fs) | 72 ± 27         | –                                          | 1660 ± 460                                 |
| <i>d</i>                   | 0.771 ± 0.001   | 1.333 ± 0.001                              | 0.339 ± 0.001                              |

Table S12: Coefficients extracted from transients at 650 nm, 10<sup>12</sup> W cm<sup>−2</sup> fitted to eq (1).

| eq (1)                     | NB <sup>+</sup> | C <sub>6</sub> H <sub>5</sub> <sup>+</sup> | C <sub>4</sub> H <sub>3</sub> <sup>+</sup> |
|----------------------------|-----------------|--------------------------------------------|--------------------------------------------|
| <i>a</i>                   | 0.14 ± 0.02     | 0.28 ± 0.04                                | 0.045 ± 0.008                              |
| <i>T</i> <sub>1</sub> (fs) | 239 ± 15        | 153 ± 13                                   | 365 ± 64                                   |
| <i>t</i> (fs)              | 430 ± 9         | 516 ± 22                                   | 464 ± 20                                   |
| <i>φ</i> (rad)             | −0.08 ± 0.09    | 3.37 ± 0.08                                | 3.42 ± 0.25                                |
| <i>b</i>                   | 0.076 ± 0.005   | −0.144 ± 0.002                             | −0.32 ± 0.01                               |
| <i>T</i> <sub>2</sub> (fs) | 736 ± 44        | 1770 ± 90                                  | 193 ± 13                                   |
| <i>c</i>                   | 0.27 ± 0.06     | –                                          | 0.094 ± 0.004                              |
| <i>T</i> <sub>3</sub> (fs) | 79 ± 16         | –                                          | 3100 ± 500                                 |
| <i>d</i>                   | 0.771 ± 0.001   | 1.608 ± 0.001                              | 0.538 ± 0.001                              |

Table S13: Coefficients extracted from transients at 650 nm, 10<sup>13</sup> W cm<sup>−2</sup> fitted to eq (1).

| eq (1)                     | NB <sup>+</sup> | C <sub>6</sub> H <sub>5</sub> <sup>+</sup> | C <sub>4</sub> H <sub>3</sub> <sup>+</sup> |
|----------------------------|-----------------|--------------------------------------------|--------------------------------------------|
| <i>a</i>                   | 0.05 ± 0.01     | 0.053 ± 0.014                              | –                                          |
| <i>T</i> <sub>1</sub> (fs) | 225 ± 41        | 139 ± 26                                   | –                                          |
| <i>t</i> (fs)              | 426 ± 10        | 362 ± 36                                   | –                                          |
| <i>φ</i> (rad)             | −0.05 ± 0.21    | 2.47 ± 0.31                                | –                                          |
| <i>b</i>                   | 0.033 ± 0.002   | −0.043 ± 0.002                             | −0.013 ± 0.006                             |
| <i>T</i> <sub>2</sub> (fs) | 841 ± 75        | 808 ± 46                                   | 260 ± 160                                  |
| <i>c</i>                   | 0.12 ± 0.11     | –                                          | 0.012 ± 0.006                              |
| <i>T</i> <sub>3</sub> (fs) | 38 ± 37         | –                                          | 960 ± 390                                  |
| <i>d</i>                   | 0.826 ± 0.001   | 1.212 ± 0.001                              | 0.264 ± 0.001                              |

Table S14: Coefficients extracted from transients at 800 nm, 10<sup>12</sup> W cm<sup>−2</sup> fitted to eq (1).

| eq (1)                     | NB <sup>+</sup> | C <sub>6</sub> H <sub>5</sub> <sup>+</sup> | C <sub>4</sub> H <sub>3</sub> <sup>+</sup> |
|----------------------------|-----------------|--------------------------------------------|--------------------------------------------|
| <i>a</i>                   | 0.08 ± 0.01     | 0.20 ± 0.02                                | –                                          |
| <i>T</i> <sub>1</sub> (fs) | 244 ± 24        | 147 ± 12                                   | –                                          |
| <i>t</i> (fs)              | 439 ± 15        | 417 ± 19                                   | –                                          |
| <i>φ</i> (rad)             | −0.13 ± 0.19    | 2.64 ± 0.13                                | –                                          |
| <i>b</i>                   | 0.085 ± 0.003   | −0.126 ± 0.002                             | −0.157 ± 0.005                             |
| <i>T</i> <sub>2</sub> (fs) | 842 ± 31        | 1560 ± 70                                  | 191 ± 11                                   |
| <i>c</i>                   | 0.36 ± 0.09     | –                                          | 0.088 ± 0.003                              |
| <i>T</i> <sub>3</sub> (fs) | 51 ± 11         | –                                          | 1680 ± 110                                 |
| <i>d</i>                   | 0.364 ± 0.001   | 1.409 ± 0.001                              | 0.338 ± 0.001                              |

Table S15: Coefficients extracted from transients at 800 nm, 10<sup>13</sup> W cm<sup>−2</sup> fitted to eq (1).
